# Supplementary material
Source: PubMed Central journal article supplement (PMC5096582)
Supplement: 003588415X14181254789448_suppl.pdf [file 003588415X14181254789448_suppl.pdf]

**Appendix 1**

Early stage oral cancer treated by surgery alone: This one-page summary gives details on the number of respondents, percentages scoring the top two responses and percentages

with a ‘significant problem’, percentages with ‘good or better’ quality of life and a word cloud giving an indication of the most important items.

## Edge Hill University



**Getting it right  
for every patient  
every time**

**"What will I be like following head and neck cancer?"**

*1. Early stage mouth cancer treated by surgery (not radiotherapy)*

Number of patients giving feedback is 423 out of a total of 601  
Patient responses closest to two years following diagnosis as this reflects long term outcome

Percentage of patients scoring on the best two responses for each domain

| <p>Activity - I am as active as I have ever been/There are times when I can't keep up my old pace, but not often</p> <p>Appearance - There is no change in my appearance/The change in my appearance is minor</p> <p>Anxiety - I am not anxious about my cancer/I am a little anxious about my cancer</p> <p>Chewing - I can chew as well as ever/I can eat soft solids but cannot chew some food</p> <p>Mood - My mood is excellent and unaffected by my cancer/My mood is generally good and only occasionally affected</p> <p>Pain - I have no pain/There is mild pain not needing medication</p> <p>Recreation - There are no limitations to recreation /There are a few things I can't do but I still get out and enjoy life</p> <p>Saliva - My saliva is of normal consistency/I have less saliva than normal, but it is enough</p> <p>Speech - My speech is the same as always/I have difficulty saying some words but I can be understood over the phone</p> <p>Shoulder - I have no problem with my shoulder/My shoulder is stiff but it has not affected my activity or strength</p> <p>Swallowing - I can swallow as well as ever/I cannot swallow certain solid foods</p> <p>Taste - I can taste food normally/I can taste most foods normally</p> |  <table border="1" style="font-size: small; margin-top: 10px;"> <thead> <tr> <th>Domain</th> <th>Top 2 Responses (%)</th> <th>Significant Problem (%)</th> </tr> </thead> <tbody> <tr><td>Ac</td><td>80</td><td>10</td></tr> <tr><td>Ap</td><td>90</td><td>10</td></tr> <tr><td>An</td><td>90</td><td>10</td></tr> <tr><td>C</td><td>90</td><td>10</td></tr> <tr><td>M</td><td>85</td><td>15</td></tr> <tr><td>P</td><td>85</td><td>15</td></tr> <tr><td>R</td><td>80</td><td>20</td></tr> <tr><td>Sa</td><td>85</td><td>15</td></tr> <tr><td>Sp</td><td>90</td><td>10</td></tr> <tr><td>Sh</td><td>90</td><td>10</td></tr> <tr><td>Sw</td><td>90</td><td>10</td></tr> <tr><td>T</td><td>85</td><td>15</td></tr> </tbody> </table> | Domain                  | Top 2 Responses (%) | Significant Problem (%) | Ac | 80 | 10 | Ap | 90 | 10 | An | 90 | 10 | C | 90 | 10 | M | 85 | 15 | P | 85 | 15 | R | 80 | 20 | Sa | 85 | 15 | Sp | 90 | 10 | Sh | 90 | 10 | Sw | 90 | 10 | T | 85 | 15 |
|----------------------------------------------------------------------------------------------------------------------------------------------------------------------------------------------------------------------------------------------------------------------------------------------------------------------------------------------------------------------------------------------------------------------------------------------------------------------------------------------------------------------------------------------------------------------------------------------------------------------------------------------------------------------------------------------------------------------------------------------------------------------------------------------------------------------------------------------------------------------------------------------------------------------------------------------------------------------------------------------------------------------------------------------------------------------------------------------------------------------------------------------------------------------------------------------------------------------------------------------------------------|-------------------------------------------------------------------------------------------------------------------------------------------------------------------------------------------------------------------------------------------------------------------------------------------------------------------------------------------------------------------------------------------------------------------------------------------------------------------------------------------------------------------------------------------------------------------------------------------------------------------------------------------------------------------------------------------------------------------------------------------------------------------------------------------------------------------------|-------------------------|---------------------|-------------------------|----|----|----|----|----|----|----|----|----|---|----|----|---|----|----|---|----|----|---|----|----|----|----|----|----|----|----|----|----|----|----|----|----|---|----|----|
| Domain                                                                                                                                                                                                                                                                                                                                                                                                                                                                                                                                                                                                                                                                                                                                                                                                                                                                                                                                                                                                                                                                                                                                                                                                                                                         | Top 2 Responses (%)                                                                                                                                                                                                                                                                                                                                                                                                                                                                                                                                                                                                                                                                                                                                                                                                     | Significant Problem (%) |                     |                         |    |    |    |    |    |    |    |    |    |   |    |    |   |    |    |   |    |    |   |    |    |    |    |    |    |    |    |    |    |    |    |    |    |   |    |    |
| Ac                                                                                                                                                                                                                                                                                                                                                                                                                                                                                                                                                                                                                                                                                                                                                                                                                                                                                                                                                                                                                                                                                                                                                                                                                                                             | 80                                                                                                                                                                                                                                                                                                                                                                                                                                                                                                                                                                                                                                                                                                                                                                                                                      | 10                      |                     |                         |    |    |    |    |    |    |    |    |    |   |    |    |   |    |    |   |    |    |   |    |    |    |    |    |    |    |    |    |    |    |    |    |    |   |    |    |
| Ap                                                                                                                                                                                                                                                                                                                                                                                                                                                                                                                                                                                                                                                                                                                                                                                                                                                                                                                                                                                                                                                                                                                                                                                                                                                             | 90                                                                                                                                                                                                                                                                                                                                                                                                                                                                                                                                                                                                                                                                                                                                                                                                                      | 10                      |                     |                         |    |    |    |    |    |    |    |    |    |   |    |    |   |    |    |   |    |    |   |    |    |    |    |    |    |    |    |    |    |    |    |    |    |   |    |    |
| An                                                                                                                                                                                                                                                                                                                                                                                                                                                                                                                                                                                                                                                                                                                                                                                                                                                                                                                                                                                                                                                                                                                                                                                                                                                             | 90                                                                                                                                                                                                                                                                                                                                                                                                                                                                                                                                                                                                                                                                                                                                                                                                                      | 10                      |                     |                         |    |    |    |    |    |    |    |    |    |   |    |    |   |    |    |   |    |    |   |    |    |    |    |    |    |    |    |    |    |    |    |    |    |   |    |    |
| C                                                                                                                                                                                                                                                                                                                                                                                                                                                                                                                                                                                                                                                                                                                                                                                                                                                                                                                                                                                                                                                                                                                                                                                                                                                              | 90                                                                                                                                                                                                                                                                                                                                                                                                                                                                                                                                                                                                                                                                                                                                                                                                                      | 10                      |                     |                         |    |    |    |    |    |    |    |    |    |   |    |    |   |    |    |   |    |    |   |    |    |    |    |    |    |    |    |    |    |    |    |    |    |   |    |    |
| M                                                                                                                                                                                                                                                                                                                                                                                                                                                                                                                                                                                                                                                                                                                                                                                                                                                                                                                                                                                                                                                                                                                                                                                                                                                              | 85                                                                                                                                                                                                                                                                                                                                                                                                                                                                                                                                                                                                                                                                                                                                                                                                                      | 15                      |                     |                         |    |    |    |    |    |    |    |    |    |   |    |    |   |    |    |   |    |    |   |    |    |    |    |    |    |    |    |    |    |    |    |    |    |   |    |    |
| P                                                                                                                                                                                                                                                                                                                                                                                                                                                                                                                                                                                                                                                                                                                                                                                                                                                                                                                                                                                                                                                                                                                                                                                                                                                              | 85                                                                                                                                                                                                                                                                                                                                                                                                                                                                                                                                                                                                                                                                                                                                                                                                                      | 15                      |                     |                         |    |    |    |    |    |    |    |    |    |   |    |    |   |    |    |   |    |    |   |    |    |    |    |    |    |    |    |    |    |    |    |    |    |   |    |    |
| R                                                                                                                                                                                                                                                                                                                                                                                                                                                                                                                                                                                                                                                                                                                                                                                                                                                                                                                                                                                                                                                                                                                                                                                                                                                              | 80                                                                                                                                                                                                                                                                                                                                                                                                                                                                                                                                                                                                                                                                                                                                                                                                                      | 20                      |                     |                         |    |    |    |    |    |    |    |    |    |   |    |    |   |    |    |   |    |    |   |    |    |    |    |    |    |    |    |    |    |    |    |    |    |   |    |    |
| Sa                                                                                                                                                                                                                                                                                                                                                                                                                                                                                                                                                                                                                                                                                                                                                                                                                                                                                                                                                                                                                                                                                                                                                                                                                                                             | 85                                                                                                                                                                                                                                                                                                                                                                                                                                                                                                                                                                                                                                                                                                                                                                                                                      | 15                      |                     |                         |    |    |    |    |    |    |    |    |    |   |    |    |   |    |    |   |    |    |   |    |    |    |    |    |    |    |    |    |    |    |    |    |    |   |    |    |
| Sp                                                                                                                                                                                                                                                                                                                                                                                                                                                                                                                                                                                                                                                                                                                                                                                                                                                                                                                                                                                                                                                                                                                                                                                                                                                             | 90                                                                                                                                                                                                                                                                                                                                                                                                                                                                                                                                                                                                                                                                                                                                                                                                                      | 10                      |                     |                         |    |    |    |    |    |    |    |    |    |   |    |    |   |    |    |   |    |    |   |    |    |    |    |    |    |    |    |    |    |    |    |    |    |   |    |    |
| Sh                                                                                                                                                                                                                                                                                                                                                                                                                                                                                                                                                                                                                                                                                                                                                                                                                                                                                                                                                                                                                                                                                                                                                                                                                                                             | 90                                                                                                                                                                                                                                                                                                                                                                                                                                                                                                                                                                                                                                                                                                                                                                                                                      | 10                      |                     |                         |    |    |    |    |    |    |    |    |    |   |    |    |   |    |    |   |    |    |   |    |    |    |    |    |    |    |    |    |    |    |    |    |    |   |    |    |
| Sw                                                                                                                                                                                                                                                                                                                                                                                                                                                                                                                                                                                                                                                                                                                                                                                                                                                                                                                                                                                                                                                                                                                                                                                                                                                             | 90                                                                                                                                                                                                                                                                                                                                                                                                                                                                                                                                                                                                                                                                                                                                                                                                                      | 10                      |                     |                         |    |    |    |    |    |    |    |    |    |   |    |    |   |    |    |   |    |    |   |    |    |    |    |    |    |    |    |    |    |    |    |    |    |   |    |    |
| T                                                                                                                                                                                                                                                                                                                                                                                                                                                                                                                                                                                                                                                                                                                                                                                                                                                                                                                                                                                                                                                                                                                                                                                                                                                              | 85                                                                                                                                                                                                                                                                                                                                                                                                                                                                                                                                                                                                                                                                                                                                                                                                                      | 15                      |                     |                         |    |    |    |    |    |    |    |    |    |   |    |    |   |    |    |   |    |    |   |    |    |    |    |    |    |    |    |    |    |    |    |    |    |   |    |    |

### Quality of Life

**77% Good or better** → 



Yellow show percentage with top 2 responses.  
Red show percentage with ‘significant’ problem.

|             | %  |
|-------------|----|
| Outstanding | 5  |
| Very Good   | 36 |
| Good        | 36 |
| Fair        | 19 |
| Poor        | 3  |
| Very poor   | 1  |

**Most important issue**  
Prominence of word approximates how often it was considered one of the top three most important issues

More information and an interactive search at [www.headandneckcancer.co.uk](http://www.headandneckcancer.co.uk) website

Appendix 2

Early stage laryngeal cancer treated by surgery alone: This one-page summary gives details on the number of respondents, percentages scoring the top two responses

and percentages with a 'significant problem', percentages with 'good or better' quality of life and a word cloud giving an indication of the most important items.

**Edge Hill University**



**Getting it right  
for every patient  
every time**

**"What will I be like following head and neck cancer?"**

*3. Early stage laryngeal cancer treated by surgery (not radiotherapy)*

Number of patients giving feedback is 92 out of a total of 149  
Patient responses closest to two years following diagnosis as this reflects long term outcome

Percentage of patients scoring on the best two responses for each domain

|                                                                                                                     |    |
|---------------------------------------------------------------------------------------------------------------------|----|
| Activity - I am as active as I have ever been/There are times when I can't keep up my old pace, but not often       | Ac |
| Appearance - There is no change in my appearance/The change in my appearance is minor                               | Ap |
| Anxiety - I am not anxious about my cancer/I am a little anxious about my cancer                                    | An |
| Chewing - I can chew as well as ever/I can eat soft solids but cannot chew some food                                | C  |
| Mood - My mood is excellent and unaffected by my cancer/My mood is generally good and only occasionally affected    | M  |
| Pain - I have no pain/There is mild pain not                                                                        | P  |
| Recreation - There are no limitations to recr                                                                       | R  |
| Saliva - My saliva is of normal consistency/I                                                                       | Sa |
| Speech - My speech is the same as always/I have difficulty saying some words but I can be understood over the phone | Sp |
| Shoulder - I have no problem with my shoulder/My shoulder is stiff but it has not affected my activity or strength  | Sh |
| Swallowing - I can swallow as well as ever/I cannot swallow certain solid foods                                     | Sw |
| Taste - I can taste food normally/I can taste most foods normally                                                   | T  |

**Quality of Life**

**77% Good or better** → 



Yellow show percentage with top 2 responses.  
Red show percentage with 'significant' problem.

|             | %  |
|-------------|----|
| Outstanding | 7  |
| Very Good   | 39 |
| Good        | 31 |
| Fair        | 17 |
| Poor        | 5  |
| Very poor   | 1  |

**Most important issue**

Prominence of word approximates how often it was considered one of the top three most important issues

More information and an interactive search at [www.headandneckcancer.co.uk](http://www.headandneckcancer.co.uk) website

Appendix 3

Late stage pharyngeal cancer treated by surgery and post-operative radiotherapy: This one-page summary gives details on the number of respondents, percentages scoring

the top two responses and percentages with a 'significant problem', percentages with 'good or better' quality of life and a word cloud giving an indication of the most important items.

Edge Hill University

**"What will I be like following head and neck cancer?"**

*18. Late stage throat cancer treated by surgery and radiotherapy*

Number of patients giving feedback is 145 out of a total of 197  
Patient responses closest to two years following diagnosis as this reflects long term outcome

Percentage of patients scoring on the best two responses for each domain

|                                                                                                                           |  |
|---------------------------------------------------------------------------------------------------------------------------|--|
| Activity - I am as active as I have ever been/There are times when I can't keep up my old pace, but not often             |  |
| Appearance - There is no change in my appearance/The change in my appearance is minor                                     |  |
| Anxiety - I am not anxious about my cancer/I am a little anxious about my cancer                                          |  |
| Chewing - I can chew as well as ever/I can eat soft solids but cannot chew some food                                      |  |
| Mood - My mood is excellent and unaffected by my cancer/My mood is generally good and only occasionally affected          |  |
| Pain - I have no pain/There is mild pain not needing medication                                                           |  |
| Recreation - There are no limitations to recreation /There are a few things I can't do but I still get out and enjoy life |  |
| Saliva - My saliva is of normal consistency/I have less saliva than normal, but it is enough                              |  |
| Speech - My speech is the same as always/I have difficulty saying some words but I can be understood over the phone       |  |
| Shoulder - I have no problem with my shoulder/My shoulder is stiff but it has not affected my activity or strength        |  |
| Swallowing - I can swallow as well as ever/I cannot swallow certain solid foods                                           |  |
| Taste - I can taste food normally/I can taste most foods normally                                                         |  |

Quality of Life

Yellow show percentage with top 2 responses.  
Red show percentage with 'significant' problem.

73% Good or better →

|             | %  |
|-------------|----|
| Outstanding | 10 |
| Very Good   | 30 |
| Good        | 33 |
| Fair        | 20 |
| Poor        | 4  |
| Very poor   | 3  |

**Most important issue**  
Prominence of word approximates how often it was considered one of the top three most important issues

More information and an interactive search at [www.headandneckcancer.co.uk](http://www.headandneckcancer.co.uk) website
